1 Mixed support for the idea that lower elevation animals are better competitors than their upper  
2 elevation relatives

3

4 Benjamin G. Freeman<sup>1,2\*</sup>

5

6 <sup>1</sup> Biodiversity Research Centre, University of British Columbia

7 <sup>2</sup> Department of Zoology, University of British Columbia

8 \*Email: [freeman@zoology.ubc.ca](mailto:freeman@zoology.ubc.ca)

9

10

11

12

13

14

15

16

17

18

19

20

21

22

23

24 Abstract

25 What factors set species' range edges? One general hypothesis, often attributed to Darwin and  
26 MacArthur, is that interspecific competition prevents species from inhabiting the warmest  
27 portions along geographic gradients (i.e., low latitudes or low elevations). A prediction arising  
28 from the Darwin-MacArthur hypothesis is that lower elevation species are better competitors  
29 than are related upper elevation species. I tested this prediction by conducting a meta-analysis  
30 of studies that have measured behavioral competition between related species along  
31 elevational gradients. I found that (1) interspecific aggression appears to be a reliable  
32 indicator of interspecific competition; (2) as predicted, lower elevation species showed  
33 stronger interspecific aggression, but only for tropical species-pairs tested with playback  
34 experiments (nearly all songbirds); (3) for a broader range of taxa where authors directly  
35 observed behavioral interactions, *upper* elevation species showed stronger interspecific  
36 aggression; and (4) in general, larger species showed greater interspecific aggression. One  
37 potential explanation for why upper elevation species often show more interspecific  
38 aggression is that they tend to be larger (Bergmann's rule; larger body sizes in colder  
39 environments). Supporting this possibility, tropical species tested with playback experiments,  
40 which do not follow Bergmann's rule, were the only group that matched predictions arising  
41 from the Darwin-MacArthur hypothesis. Hence, available evidence does not consistently  
42 support the longstanding hypothesis that relative range position predicts the outcome of  
43 interspecific competition. Instead, body size is a better predictor of behavioral competition.  
44 Last, I consider these results in the context of the hypothesis that behavioral interactions may  
45 impact rates of upslope range shifts associated with recent warming.

46

47 Since Darwin, biologists have proposed that species interactions set species' warm range  
48 edges, while climate sets species' cold range edges (Darwin, 1859; MacArthur, 1972). A  
49 geographic prediction arising from this "Darwin-MacArthur" hypothesis is that species  
50 interactions—often thought to be competition—limit species' ranges at low latitudes or low  
51 elevations (Louthan *et al.*, 2015). While some comparative studies have revealed patterns  
52 consistent with this prediction (Sunday *et al.*, 2012; Hargreaves *et al.*, 2014), others have  
53 shown opposite patterns (Cahill *et al.*, 2014; Freeman *et al.*, 2018). Therefore, whether  
54 competition (or other interactions) limit species' warm range edges in nature remains an open  
55 question. One useful way to evaluate predictions arising from the Darwin-MacArthur  
56 hypothesis is to examine interactions between related species that live in different latitudinal  
57 or elevational zones. Here, I take this approach, focusing on competition along mountain  
58 slopes: I conducted a meta-analysis to test the prediction that species living at low elevations  
59 are better competitors than related species living at high elevations.

60 In this study, I focus on the behavioral component of competition (interference  
61 competition). Interspecific interference competition is often mediated by interspecific  
62 aggression (Schoener, 1983; Dhondt, 2011; Grether *et al.*, 2017), such that a better competitor  
63 will tend to exhibit more interspecific aggression in an interaction with a related species. If so,  
64 then the prediction arising from the Darwin-MacArthur hypothesis is that lower elevation  
65 species should be more aggressive to upper elevation relatives than vice versa. To test this  
66 prediction, I compiled a dataset of studies that have measured interspecific aggression  
67 between species-pairs where the two species live primarily in different elevational zones. A  
68 key assumption of my study is that interspecific aggression is a valid proxy for interspecific  
69 competition; I find support for this assumption when analyzing the subset of studies that

70 measured both interspecific aggression and interspecific competition (Table 1, also see  
71 Results).

72 A further motivation for testing general patterns of interspecific aggression as a  
73 function of elevational position is that behavioral interactions have been hypothesized to  
74 influence species' geographic responses to climate change. The idea is that while we might  
75 generally expect species to shift upslope as a consequence of warming temperatures (as  
76 indeed is happening in nature; Chen *et al.*, 2011; Lenoir & Svenning, 2015; Freeman *et al.*,  
77 2018), behavioral interactions could lead to faster or slower shifts over short time scales. That  
78 is, more aggressive lower elevation species might be able to rapidly colonize higher  
79 elevations, in the process “pushing” upper elevation relatives to ever higher elevations at rates  
80 faster than expected based solely on temperature changes; alternately, more aggressive upper  
81 elevation species might be able to avoid range contractions at their lower elevation (warm)  
82 range edge, persisting as “kings of the mountain”, at least in the short term (Jankowski *et al.*,  
83 2010). The possibility that behavioral interactions influence rates of warming-associated  
84 upslope shifts has yet to be tested. Still, it is uncertain which of these situations—lower  
85 elevation species more aggressive (consistent with the Darwin-MacArthur hypothesis) vs.  
86 upper elevation species more aggressive—predominates in the real world. Hence, this meta-  
87 analysis both tests a longstanding hypothesis in ecology, and also provides information that is  
88 potentially relevant to understanding and predicting contemporary range shifts along  
89 mountain slopes.

90

91 Methods

92 I searched the literature to find studies that measured interspecific aggression between species

93 that live in different elevational zones along mountain slopes. I conducted a Web of Science  
94 search on 18 April 2019 with the keywords “behav\*” OR “aggress\*” AND “elevation\*” OR  
95 “altitu\*” AND “compet\*”. This search returned 561 studies. I retained studies that met the  
96 following two criteria: (1) They measured aggressive interactions between two closely related  
97 species (typically congeners), and (2) The two species in question inhabit roughly parapatric  
98 elevational zones during the breeding season (or all year long), with one species  
99 predominately living at lower elevations and the other at higher elevations. Disappointingly,  
100 this Web of Science search failed to return several older relevant papers that are routinely  
101 cited within this literature (e.g., Brown, 1971; Heller, 1971). Because my overall goal was to  
102 compile a comprehensive dataset, I located additional appropriate studies by (1) inspecting  
103 citations within papers identified by the Web of Science search, and (2) following citation  
104 webs. The final dataset included 57 estimates of interspecific aggression for 47 unique  
105 species-pairs from 34 studies. While the majority of estimates came from the temperate zone  
106 (absolute latitude > 23.4; N = 36), the tropics (absolute latitude < 23.4; N = 21) were also well  
107 represented (Figure 1). Taxonomically, the dataset consists of estimates for birds (N = 28),  
108 mammals (N = 12, mostly chipmunks from western North America), amphibians (N = 7, all  
109 *Plethodon* salamanders from the Appalachian Mountains in eastern North America), fishes (N  
110 = 8, all salmonids from temperate regions), reptiles (N = 1) and insects (N = 1).

111       Upon examining relevant studies, I found a fundamental distinction between instances  
112 where authors directly observed interspecific aggression (N = 35), and those where authors  
113 measured aggressive behaviors in response to the simulated presence of a heterospecific (N =  
114 22). Direct interaction studies measured aggression during contests in laboratory behavioral  
115 trials or at food sources placed in the environment (e.g., feeders). In contrast, simulated

116 interaction studies measured aggression in response to song playback experiments, and were  
117 nearly always (21 out of 22) conducted on songbirds. Importantly, direct interaction vs.  
118 simulated playback studies (hereafter “direct” and “playback”) reported different metrics of  
119 interspecific aggression. I was unable to analyze these different metrics in a single meta-  
120 analytic model. Direct studies reported either the winner of aggressive contests or the number  
121 of aggressive behaviors exhibited during such contests. For these direct studies, I summarized  
122 interspecific aggression between the species-pair as a proportion—the proportion of contests  
123 won by the lower elevation species, or the proportion of total aggressive behaviors exhibited  
124 by the lower elevation species. Here, larger proportions indicate that the lower elevation  
125 species tends to win contests or exhibits more aggressive behaviors. This quantity can be  
126 directly used to test the prediction that lower elevation species are more aggressive to upper  
127 elevation relatives than vice versa. In contrast, playback studies reported aggression scores in  
128 response to a simulated heterospecific intruder (typically PC1 scores from a multivariate  
129 analysis of behavioral responses to playback, less often a univariate metric of aggression such  
130 as closest approach to the speaker). For these playback studies, I summarized interspecific  
131 aggression between the species-pair as an effect score—the difference in mean aggression  
132 scores between lower elevation and upper elevation species. Here, positive values represent  
133 cases where the lower elevation species showed more interspecific aggression than did the  
134 upper elevation species. Again, this difference can be directly used to test the prediction that  
135 lower elevation species are more aggressive to upper elevation relatives than vice versa. For  
136 all studies, when results were presented only in figures, I extracted data using  
137 WebPlotDigitizer (Rohatgi, 2017).

138 My principal aim in this study is to assess if lower elevation species show more

139 interspecific aggression to upper elevation relatives than the reverse. I tested this idea by  
140 fitting mixed effect meta-analytic models using the “metafor” package (Viechtbauer, 2010) in  
141 R (R Development Core Team, 2017). I fit distinct models for direct and playback studies.  
142 These models weight individual estimates by the inverse of their squared standard errors, and  
143 incorporate the estimated variance among the study-specific effect sizes. Because my dataset  
144 included some species-pairs with multiple estimates of interspecific aggression (i.e., the same  
145 species-pair was measured in different studies), I included species-pair as a random effect in  
146 all models. For both direct and playback studies, I explored whether patterns differed between  
147 latitudinal zones or taxonomic groups by fitting secondary models that included either  
148 latitudinal zone or taxa as a moderator variable, and compared model fit using AIC. I did not  
149 fit a secondary model with taxonomic group for playback studies because nearly all playback  
150 studies were conducted on birds (21 out of 22 cases). The null expectation for the direct  
151 studies model is that the lower elevation species should win 50% of contests or exhibit 50%  
152 of observed aggressive behaviors. For playback studies, the null expectation is that lower and  
153 upper elevation species should have similar interspecific aggression scores, such that the true  
154 mean difference in aggression score is 0.

155         Last, I tested how body size was related to both interspecific aggression and  
156 elevational position. I extracted body size data (masses for birds and mammals, snout-vent-  
157 length for salamanders) from papers or, when not presented in papers, from reference volumes  
158 (Dunning, 2007; Wilman *et al.*, 2014) or personal communication with authors. I then used  
159 binomial tests to evaluate (1) if larger species showed more aggression to smaller species than  
160 vice versa (as expected, see Martin & Ghalambor, 2014), and (2) if upper elevation species  
161 tend to be larger than lower elevation species (as expected given Bergmann’s rule). For these

162 analyses, I did not include playback studies where neither species showed interspecific  
163 aggression (defined as cases where response to song from the putative competitor was  
164 statistically indistinguishable from response to a negative control, a song from a totally  
165 unrelated species that is not expected to elicit any response). In sum I analyzed body mass for  
166 33 unique species-pairs where at least one species showed interspecific aggression.

167

## 168 Results

169 Interspecific aggression between related species along mountain slopes appears to be fairly  
170 common in nature. This is somewhat surprising, especially for playback studies. It is perhaps  
171 to be expected that individuals will behave aggressively when placed in a small laboratory  
172 arena with a single resource (i.e., most direct studies). But there is little expectation that  
173 simply broadcasting the song of a relative—a song that typically sounds obviously different  
174 from the focal species' own song—should elicit an aggressive response. Nevertheless, the  
175 majority of species-pairs tested with playback studies in my dataset (15 out of 20) showed  
176 interspecific aggression, and interspecific aggression was as strong as intraspecific aggression  
177 in one-third of cases (7 out of 22; denominators differ because these inferences depend on  
178 experimental design, which varied among studies). Further, strong interspecific aggression  
179 appears to indicate competitive dominance, at least within this dataset. In the 10 studies that  
180 measured both interspecific aggression and interspecific competition, the more aggressive  
181 species was the better competitor in 9 out of 10 cases (binomial test;  $p = 0.021$ ; Table 1).

182 I found mixed evidence that lower elevation species are more aggressive to upper  
183 elevation relatives than vice versa. For direct studies, the *upper* elevation species tended to  
184 win most contests or exhibit more aggressive behaviors in contests (Figure 2), the opposite of



185 the predicted relationship. Competing models that included latitudinal zone or taxa as  
186 moderator variables provided poorer fits to the data ( $\Delta$  AIC = 1.81 and 8.42, respectively). In  
187 contrast, in playback studies, lower elevation species did tend to exhibit more interspecific  
188 aggression (Figure 3), with an overall mean effect size that narrowly overlapped the null  
189 expectation of zero. A model that included latitudinal zone (tropical vs. temperate) provided a  
190 better fit to the data than a model without this moderator variable ( $\Delta$  AIC = 1.66). In the  
191 model that included latitudinal zone, the estimate for tropical species-pairs was positive and  
192 did not overlap zero, indicating that the tendency for lower elevation species to be more  
193 aggressive in playback studies was associated with the tropics (Figure 3; the estimate for the  
194 subgroup of temperate zone species-pairs was approximately zero). While most studies  
195 conducted either direct observations or playback experiments, there were two studies that  
196 measured interspecific aggression using both direct observations and playback experiments,  
197 and these two studies both reported congruent results between the two methodologies (Pasch  
198 *et al.*, 2013; Barve & Dhondt, 2017).

199 I found evidence that body size drives observed patterns of interspecific aggression.  
200 Larger species tended to show stronger interspecific aggression (24 out of 33 species-pairs;  
201 binomial test;  $p = 0.014$ ). However, overall, upper elevation species were not larger more  
202 often than by chance (18 out of 33 upper elevation species-pairs were larger; binomial test;  $p$   
203 = 0.72). The association between size and elevational position differed somewhat between  
204 datasets (see Table 2), with upper elevation species tending to be larger in studies that directly  
205 observed behaviors (13 out of 21) but not in playback studies from the tropics (5 out of 11)  
206 [there were only three playback studies from the temperate zone that showed interspecific  
207 aggression; the upper elevation species was larger in two of these three cases].

Figure 1. Map of studies that measured interspecific aggression between lower vs. upper elevation species. Studies that directly observed aggressive interactions are shown in pink; those that used playback to simulate interactions are shown in blue. Many studies report data for multiple species-pairs from the same site, illustrated by the size of the circle. The Tropics of Cancer and Capricorn (at 23.4° N and S, respectively) delimit the tropics, and are illustrated with dashed lines. This map was made using the package “ggmap” (Kahle & Wickham, 2013)

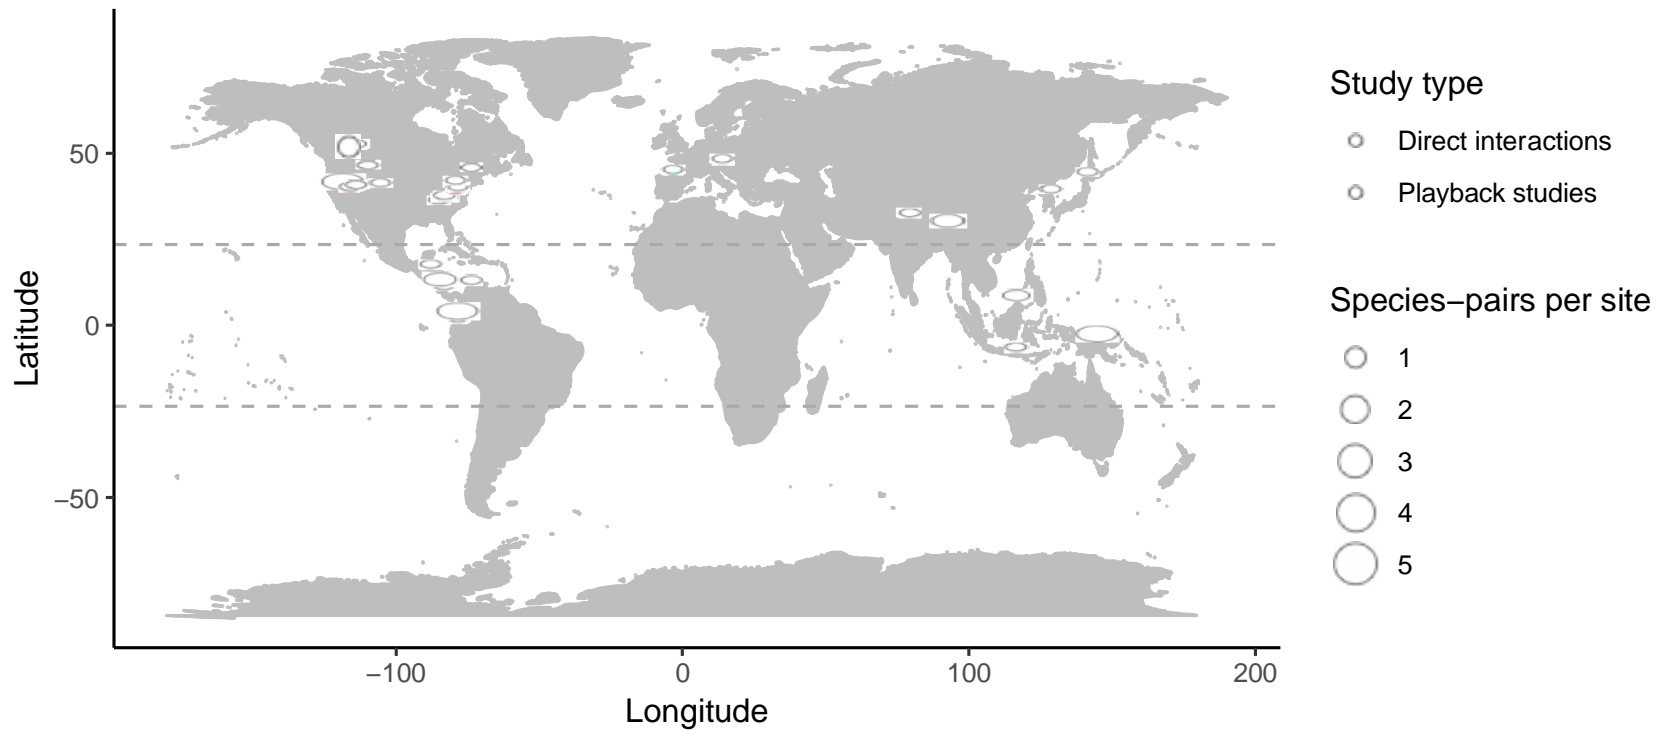

Figure 2. Results of studies that directly observed interspecific aggression (N = 36). The summary metric is the proportion of contests won, or aggressive behaviors exhibited, by the lower elevation species ( $\pm$  SE); this score would be 1 if the lower elevation species won all contests or exhibited 100% of all observed aggressive behaviors. Studies are identified by their author(s), year, and the scientific names of the species-pair.

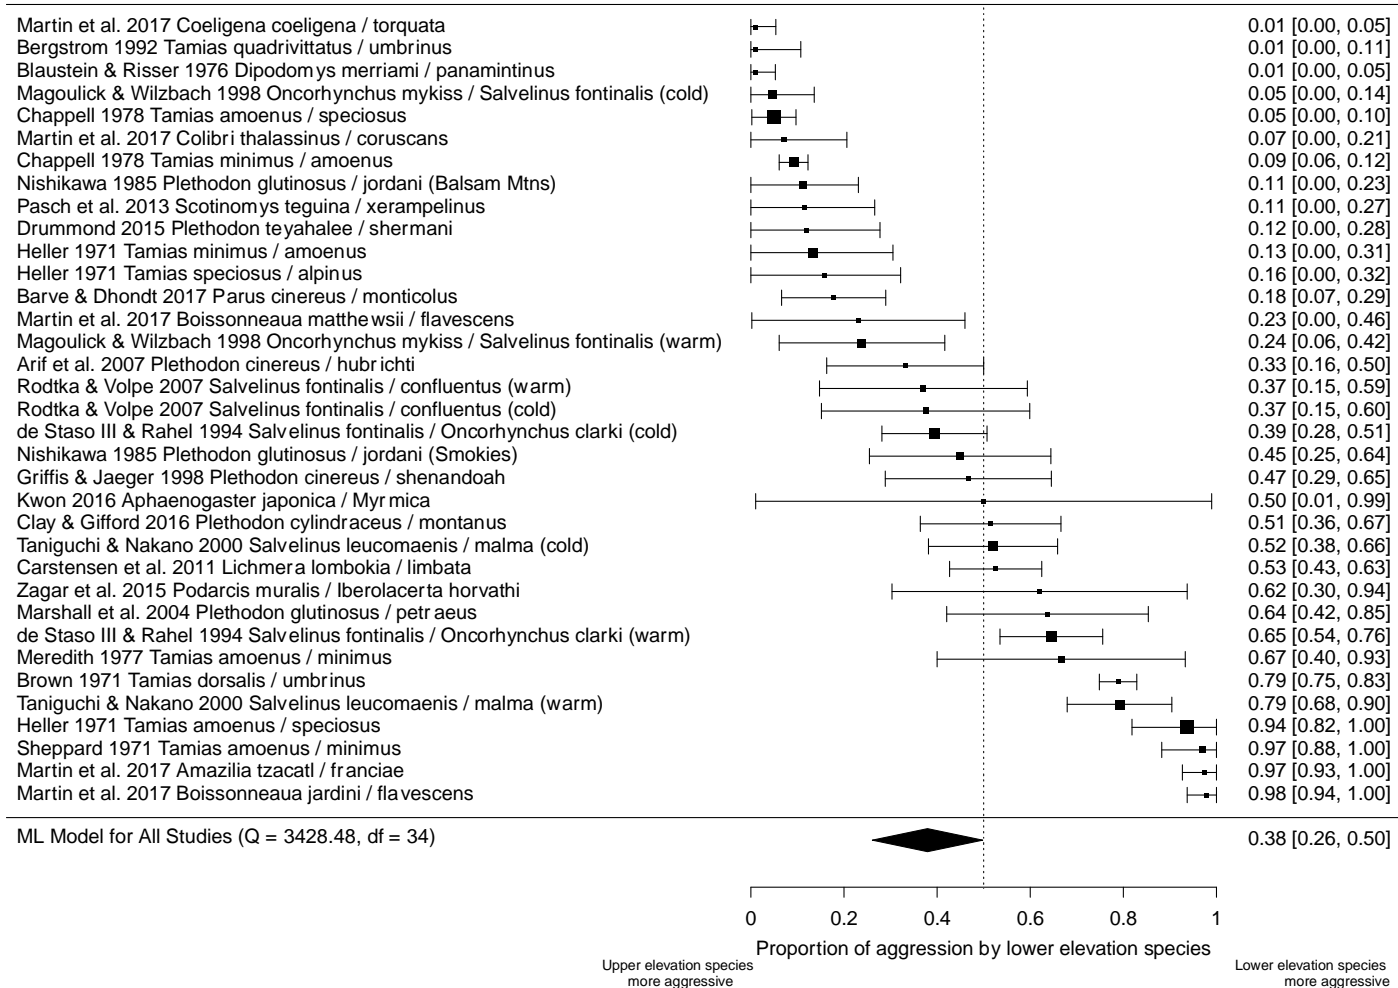



Table 1. Details for 10 studies that measured both interspecific aggression and interspecific competition between lower vs. upper elevation species. The methods used to infer aggression and competition are given as parentheticals. The key question is whether interspecific aggression indicates interspecific competition. If the more aggressive species is also the better competitor, correspondence = “Yes”. Studies are arranged by year of publication.

| Study                     | Taxa         | Location            | Aggression                                                                                                                       | Competition                                                                                                                              | Correspondence                                    |
|---------------------------|--------------|---------------------|----------------------------------------------------------------------------------------------------------------------------------|------------------------------------------------------------------------------------------------------------------------------------------|---------------------------------------------------|
| Blaustein & Risser 1976   | Jumping mice | Nevada, USA         | Upper elevation species more aggressive (behavioral trials)                                                                      | Upper elevation species excludes lower elevation species (time series data from Price et al. 2000)                                       | Yes                                               |
| Chappell 1978             | Chipmunks    | California, USA     | Upper elevation species more aggressive (contests at feeders)                                                                    | Upper elevation species excludes lower elevation species (removal experiment)                                                            | Yes                                               |
| Nishikawa 1985            | Salamanders  | North Carolina, USA | Upper elevation species more aggressive (behavioral trials replicated in two mountain ranges)                                    | Upper elevation species excludes lower elevation species (removal experiment data from Hairston 1980, replicated in two mountain ranges) | Yes                                               |
| De Staso III & Rahel 1994 | Trout        | Wyoming, USA        | Upper elevation species more aggressive in cold water, lower elevation species more aggressive in warm water (behavioral trials) | Upper elevation species better competitor in cold water, lower elevation species better competitor in warm water (feeding rates)         | Yes, including reversal at different temperatures |
| Griffis & Jaeger 1998     | Salamanders  | Virginia, USA       | Lower elevation species = Upper elevation species (behavioral trials)                                                            | Lower elevation species excludes upper elevation species (removal experiment)                                                            | No                                                |
| Magoulick & Wilzbach 1998 | Trout        | Pennsylvania, USA   | Upper elevation species more aggressive (behavioral trials)                                                                      | Upper elevation species better competitor (relative growth rates)                                                                        | Yes                                               |
| Taniguchi & Nakano        | Salmon       | Hokkaido, Japan     | Lower elevation species more aggressive                                                                                          | Lower elevation species better competitor (relative growth rates)                                                                        | Yes                                               |

|                     |              |                     |                                                             |                                                                                                                                 |     |
|---------------------|--------------|---------------------|-------------------------------------------------------------|---------------------------------------------------------------------------------------------------------------------------------|-----|
| 2000                |              |                     | (behavioral trials)                                         |                                                                                                                                 |     |
| Rodtka & Volpe 2007 | Trout        | Colorado, USA       | Upper elevation species more aggressive (behavioral trials) | Upper elevation species better competitor (weight changes in experiments)                                                       | Yes |
| Pasch et al. 2013   | Singing mice | Cartago, Costa Rica | Upper elevation species more aggressive (behavioral trials) | Upper elevation species excludes lower elevation species (removal experiment)                                                   | Yes |
| Drummond 2015       | Salamanders  | North Carolina, USA | Upper elevation species more aggressive (behavioral trials) | Upper elevation species excludes lower elevation species (thermal physiology and niche modeling data from Gifford & Kozak 2012) | Yes |

Table 2. Patterns of body size, interspecific aggression, and elevational position for species-pairs from direct observation and playback studies. Relative size and relative interspecific aggression are coded as binary variables. Larger species tend to show more interspecific aggression than do smaller species (gray cells vs. white cells). In direct observation studies, but not playback studies (at least in the tropics), upper elevation species tend to be larger than lower elevation species (second column vs. first column). The numbers presented in this table sum to 35 (not 33) because two studies measured interspecific aggression using both direct observations and playback.

| Direct observation studies |                |                |
|----------------------------|----------------|----------------|
|                            | Lower = bigger | Upper = bigger |
| Lower = more aggressive    | 5              | 2              |
| Upper = more aggressive    | 3              | 11             |

  

| Playback studies (tropical) |                |                |
|-----------------------------|----------------|----------------|
|                             | Lower = bigger | Upper = bigger |
| Lower = more aggressive     | 6              | 3              |
| Upper = more aggressive     | 0              | 2              |

  

| Playback studies (temperate) |                |                |
|------------------------------|----------------|----------------|
|                              | Lower = bigger | Upper = bigger |
| Lower = more aggressive      | 1              | 1              |
| Upper = more aggressive      | 0              | 1              |

208 Discussion

209 I found mixed support for the prediction arising from the Darwin-MacArthur hypothesis that  
210 lower elevation species are more aggressive to their upper elevation relatives than vice versa.  
211 While lower elevation species showed stronger interspecific aggression in playback studies  
212 from the tropics, *upper* elevation species exhibited stronger interspecific aggression in studies  
213 that directly observed aggression, across a range of latitudes. Playback experiments were  
214 almost exclusively performed on forest-dwelling insectivorous birds, while direct observation  
215 studies investigated a much broader swath of biological diversity. Hence, I interpret this  
216 dataset as showing that insectivorous forest birds in the tropics show patterns consistent with  
217 the Darwin-MacArthur hypothesis, while patterns for other taxa, including for birds that are  
218 not tropical insectivores, are opposite to the prediction arising from the Darwin-MacArthur  
219 hypothesis. These mixed results indicate that the Darwin-MacArthur hypothesis is not a  
220 general explanation of aggressive interactions between related species along elevational  
221 gradients.

222 I next examine three reasons why my results do not consistently agree with predictions  
223 arising from the Darwin-MacArthur hypothesis, beginning with the possibility that my study  
224 is inappropriately designed. The most obvious caveat to my approach is that I attempt to study  
225 interspecific competition by analyzing patterns of interspecific aggression. That is, I assume  
226 interspecific aggression indicates competitive ability. This assumption need not hold—e.g.,  
227 the most aggressive person lifting weights in your neighborhood gym may not necessarily win  
228 the local weightlifting competition. Nevertheless, this assumption does appear to be met in my  
229 dataset, as the more aggressive species was the better competitor in 9 out of 10 cases where  
230 researchers measured both variables ( $p = 0.021$ ; Table 1). In addition, the subset of studies



231 that measured interspecific competition are perhaps the most appropriate raw material for  
232 testing the Darwin-MacArthur hypothesis, but these “gold standard” studies fail to support  
233 predictions arising from this hypothesis. Instead, the *upper* elevation species was  
234 competitively superior to the lower elevation species in most cases where biologists measured  
235 competition (7 out of 9, see Table 1; note that competitive dominance flipped with  
236 temperature in one case).

237         Second, the evolution of larger body sizes at high elevations drivers could reverse  
238 expectations for patterns of interspecific aggression between low and high elevation species.  
239 That is, contra the Darwin-MacArthur hypothesis, we might expect *upper* elevation species to  
240 show more aggression towards lowland species than vice versa when two conditions are  
241 met— (1) larger species tend to win aggressive behavioral contests, and (2) species in colder  
242 high elevations are larger. These conditions likely apply broadly. The pattern that larger  
243 species tend to show more interspecific aggression than smaller species is strongly supported  
244 (Martin & Ghalambor, 2014), and Bergmann’s rule describes the well-known pattern that  
245 species in colder environments are larger. Indeed, larger species in my dataset exhibited more  
246 interspecific aggression in 73% of species-pairs ( $p = 0.014$ , see Table 2). In contrast, upper  
247 elevation taxa were larger in only just over half—55%—of species-pairs in my dataset ( $p =$   
248  $0.73$ , see Table 2). Intriguingly, there is a rough correspondence between whether species-  
249 pairs show Bergmann’s rule body size clines and whether they show patterns consistent with  
250 predictions arising from the Darwin-MacArthur hypothesis. The only dataset that showed the  
251 predicted pattern of stronger interspecific aggression from lower elevation species was for  
252 tropical species-pairs (nearly all birds) from playback experiments, and there was no trend for  
253 upper elevation species to be larger within this subset (see Table 2). This is consistent with

254 previous research showing that tropical birds do not generally follow Bergmann's rule  
255 (Freeman, 2017). In contrast, upper elevation species did tend to be larger than lower  
256 elevation species in taxa in the direct observation dataset (where upper elevation species  
257 showed stronger interspecific aggression) and also for the small number of temperate zone  
258 species (Table 2). Hence, one possibility is that the evolution of larger body sizes at higher,  
259 colder elevations, at least in non-tropical birds, in conjunction with an advantage for larger  
260 body size in interspecific interference competition, may explain why the Darwin-MacArthur  
261 hypothesis does not generally apply to global patterns of interspecific aggression along  
262 mountain slopes. Further research with larger sample sizes is necessary to test this possibility.

263 Third, the simple logic of the Darwin-MacArthur hypothesis may require further  
264 refinement (see also Louthan *et al.*, 2015). Darwin's proposal was that harsh climates prevent  
265 species from colonizing polar regions or high elevations, but that climate alone is unlikely to  
266 prevent species from colonizing the tropics or low elevations (Darwin, 1859). Instead, Darwin  
267 thought that tropical or low elevation species would have greater competitive ability relative  
268 to related temperate zone or high elevation species. This greater competitive ability would  
269 then prevent temperate zone/high elevation species from expanding at their warm range edge.  
270 However, if this basic scenario holds, with species' warm range edges limited primarily by  
271 competition (and not by abiotic harshness), then selection on individuals' competitive abilities  
272 would be strong at their warm range edge. If so, we might actually expect the evolution of  
273 increased competitive ability at species' *warm* range edges. One prediction of this idea might  
274 be that shared range edges between lower vs. upper elevation species are located not where  
275 the lower elevation species meets unfavorable climatic conditions, but instead where the  
276 competitive balance tips between species adapted to different abiotic environments. In this

277 case we might expect flips in competitive abilities along the elevational gradient, with the  
278 lower elevation species a better competitor at lower, warmer elevations, and the upper  
279 elevation species a better competitor at upper, cooler elevations (condition-dependent  
280 competition; see examples in Woodward, 1975; Taniguchi & Nakano, 2000; De Staso &  
281 Rahel, 2004; Altshuler, 2006). In general, investigating how selection on competitive ability  
282 varies across species' ranges is likely to offer fresh insights for when competition sets  
283 species' range edges.

284

### 285 *Behavioral interactions and range shifts*

286 There have been widespread calls to incorporate species interactions when attempting to  
287 understand or predict species' geographic responses to climate change (e.g., Araújo & Luoto,  
288 2007; Alexander *et al.*, 2015). Behavioral interactions have the potential to be important for  
289 range limits. Indeed, case studies show that interspecific aggression appears to promote recent  
290 dramatic range expansions of native taxa (Duckworth & Badyaev, 2007; Wiens *et al.*, 2014).  
291 Extended to climate-associated range shifts, the idea is that aggressive lower elevation species  
292 could rapidly colonize elevations beyond their upper limit, "pushing" upper elevation  
293 relatives upslope, or that aggressive upper elevation species could hold steady at their lower  
294 limit as "kings of the mountain" despite warming. However, whether behavioral competition  
295 influences range shifts associated with climate change remains an open question. Consistent  
296 with a potential role for behavioral interactions in driving recent upslope shifts, I and  
297 colleagues reported that three aggressive lower elevation species of tropical birds have  
298 expanded their ranges upslope associated with recent warming while two non-aggressive  
299 lower elevation species have failed to expand (Freeman *et al.*, 2016). But another empirical

300 example shows the reverse case—in the last century, a high elevation chipmunk (*Tamias*  
301 *speciosus*) has dramatically shifted upslope in the Sierra Nevadas in California (Moritz *et al.*,  
302 2008) despite being a better behavioral competitor than a related lower elevation chipmunk  
303 (Heller, 1971). Clearly, many more studies are needed before we can confidently state that  
304 behavioral interactions between lower vs. upper elevation species do (or do not) predict  
305 species' distributional responses to recent climate change.

306

### 307 *Conclusions*

308 Probing the drivers of species' range edges—explaining why a species lives *here* but not  
309 *there*—is a fundamental goal of ecology. More recently, this basic research has been reborn as  
310 an applied question, as ecologists are tasked with predicting where species will live in a  
311 warmer and climatically different future. The idea that general rules govern range limits is  
312 alluring in both basic and applied contexts, and the proposal that species' warm range edges  
313 are set by competition (here termed the Darwin-MacArthur hypothesis) is one such general  
314 rule. In this paper I find mixed support for the prediction arising from this hypothesis that  
315 lower elevation species are better competitors than their upper elevation relatives, at least for  
316 behavioral competition. The “glass half empty” response to this finding would be to jettison  
317 the Darwin-MacArthur hypothesis (conditioned on the relatively small sample size of this  
318 study and the particular prediction being tested). However, an alternative “glass half full”  
319 approach would be to add a wrinkle to the hypothesis—that lower elevation species may  
320 indeed tend to be better behavioral competitors than their upper elevation relatives, but only  
321 when they are similar in mass (i.e., when Bergmann's rule does not apply). Testing which of  
322 these scenarios is better supported will require additional data. I was pleasantly surprised to

323 find as many studies measuring behavioral interactions between species-pairs along mountain  
324 slopes as I did (57 estimates of interspecific aggression for 47 unique species-pairs from 34  
325 studies), but more empirical data is needed to test whether Bergmann's rule modifies the  
326 general expectation that competition sets warm range limits, or that behavioral interactions are  
327 important in driving climate-associated range shifts, at least in the short term. My hope is that  
328 this literature continues to expand, such that someone revisiting this topic in a decade's time  
329 will be able to provide firm answers to these and related questions.

330

### 331 Acknowledgements

332 This research would not be possible without the many dedicated researchers who have  
333 measured and published behavioral interactions along mountain slopes—thank you and keep  
334 up the good work. I was supported by postdoctoral fellowships from the Biodiversity  
335 Research Centre and Banting Canada (#379958). None of my funders had any influence on  
336 the content of the submitted manuscript, and none of my funders required approval of the  
337 final manuscript to be published. Comments from the Schluter lab group, Locke Rowe and  
338 Ralf Yorke improved this manuscript.

339

### 340 References

- 341 Alexander, J.M., Diez, J.M. & Levine, J.M. (2015) Novel competitors shape species'  
342 responses to climate change. *Nature*, **525**, 515–518.
- 343 Altshuler, D.L. (2006) Flight performance and competitive displacement of hummingbirds  
344 across elevational gradients. *American Naturalist*, **167**, 216–229.
- 345 Araújo, M.B. & Luoto, M. (2007) The importance of biotic interactions for modelling species

- 346 distributions under climate change. *Global Ecology and Biogeography*, **16**, 743–753.
- 347 Barve, S. & Dhondt, A.A. (2017) Elevational replacement of two Himalayan titmice:  
348 interspecific competition or habitat preference? *Journal of Avian Biology*, **48**, 1189–  
349 1194.
- 350 Brown, J.H. (1971) Mechanisms of competitive exclusion between 2 species of chipmunks.  
351 *Ecology*, **52**, 305–311.
- 352 Cahill, A.E., Aiello-Lammens, M.E., Caitlin Fisher-Reid, M., Hua, X., Karanewsky, C.J.,  
353 Ryu, H.Y., Sbeglia, G.C., Spagnolo, F., Waldron, J.B. & Wiens, J.J. (2014) Causes of  
354 warm-edge range limits: systematic review, proximate factors and implications for  
355 climate change. *Journal of Biogeography*, **41**, 429–442.
- 356 Chen, I.-C., Hill, J.K., Ohlemüller, R., Roy, D.B. & Thomas, C.D. (2011) Rapid range shifts  
357 of species associated with high levels of climate warming. *Science*, **333**, 1024–1026.
- 358 Darwin, C. (1859) *On the origin of species by means of natural selection*, J. Murray, London,.
- 359 Dhondt, A.A. (2011) *Interspecific competition in birds*, Oxford University Press.
- 360 Duckworth, R.A. & Badyaev, A. V (2007) Coupling of dispersal and aggression facilitates the  
361 rapid range expansion of a passerine bird. *Proceedings of the National Academy of*  
362 *Sciences*, **104**, 15017–15022.
- 363 Dunning, J.B. (2007) *CRC Handbook of Avian Body Masses*, Second Ed.
- 364 Freeman, B.G. (2017) Little evidence for Bergmann’s rule body size clines in passerines  
365 along tropical elevational gradients. *Journal of Biogeography*, **44**, 502–510.
- 366 Freeman, B.G., Class Freeman, A.M. & Hochachka, W.M. (2016) Asymmetric interspecific  
367 aggression in New Guinean songbirds that replace one another along an elevational  
368 gradient. *Ibis*, **158**, 726–737.

- 369 Freeman, B.G., Lee-Yaw, J.A., Sunday, J.M. & Hargreaves, A.L. (2018) Expanding, shifting  
370 and shrinking: The impact of global warming on species' elevational distributions.  
371 *Global Ecology and Biogeography*, **27**, 1268–1276.
- 372 Grether, G.F., Peiman, K.S., Tobias, J.A. & Robinson, B.W. (2017) Causes and  
373 Consequences of Behavioral Interference between Species. *Trends in Ecology and*  
374 *Evolution*, **32**, 760–772.
- 375 Hargreaves, A.L., Samis, K.E. & Eckert, C.G. (2014) Are species' range limits simply niche  
376 limits writ large? A review of transplant experiments beyond the range. *The American*  
377 *Naturalist*, **183**, 157–73.
- 378 Heller, H.C. (1971) Altitudinal zonation of chipmunks (*Eutamias*): interspecific aggression.  
379 *Ecology*, **52**, 312–319.
- 380 Jankowski, J.E., Robinson, S.K. & Levey, D.J. (2010) Squeezed at the top: Interspecific  
381 aggression may constrain elevational ranges in tropical birds. *Ecology*, **91**, 1877–1884.
- 382 Kahle, D. & Wickham, H. (2013) ggmap: Spatial Visualization with ggplot2. *The R Journal*,  
383 **5**, 144–161.
- 384 Lenoir, J. & Svenning, J.C. (2015) Climate-related range shifts - a global multidimensional  
385 synthesis and new research directions. *Ecography*, **38**, 15–28.
- 386 Louthan, A.M., Doak, D.F. & Angert, A.L. (2015) Where and When do Species Interactions  
387 Set Range Limits? *Trends in Ecology & Evolution*, **30**, 780–792.
- 388 MacArthur, R.H. (1972) *Geographical ecology: patterns in the distribution of species*,  
389 Princeton University Press, Princeton.
- 390 Martin, P.R. & Ghalambor, C.K. (2014) When David beats Goliath: the advantage of large  
391 size in interspecific aggressive contests declines over evolutionary time. *PloS one*, **9**,

392 e108741.

393 Moritz, C., Patton, J.L., Conroy, C.J., Parra, J.L., White, G.C. & Beissinger, S.R. (2008)

394 Impact of a century of climate change on small-mammal communities in Yosemite

395 National Park, USA. *Science*, **322**, 261–264.

396 Pasch, B., Bolker, B.M. & Phelps, S.M. (2013) Interspecific dominance via vocal interactions

397 mediates altitudinal zonation in Neotropical singing mice. *The American Naturalist*, **182**,

398 E161–E173.

399 R Development Core Team (2017) R: A language and environment for statistical computing.

400 Rohatgi, A. (2017) WebPlotDigitizer 3.11.

401 Schoener, T.W. (1983) Field experiments on interspecific competition. *The American*

402 *Naturalist*, **122**, 240–285.

403 De Staso, J. & Rahel, F.J. (2004) Influence of Water Temperature on Interactions between

404 Juvenile Colorado River Cutthroat Trout and Brook Trout in a Laboratory Stream.

405 *Transactions of the American Fisheries Society*, **123**, 289–297.

406 Sunday, J.M., Bates, A.E. & Dulvy, N.K. (2012) Thermal tolerance and the global

407 redistribution of animals. *Nature Climate Change*, **2**, 686–690.

408 Taniguchi, Y. & Nakano, S. (2000) Condition-specific competition: implications for the

409 altitudinal distribution of stream fishes. *Ecology*, **81**, 2027–2039.

410 Viechtbauer, W. (2010) Conducting meta-analyses in R with the metafor package. *Journal of*

411 *Statistical Software*, **36**, 1–48.

412 Wiens, J.D., Anthony, R.G. & Forsman, E.D. (2014) Competitive interactions and resource

413 partitioning between northern spotted owls and barred owls in western Oregon. *Wildlife*

414 *Monographs*, **185**, 1–50.



- 415 Wilman, H., Belmaker, J., Simpson, J., de la Rosa, C., Rivadeneira, M.M. & Jetz, W. (2014)  
416 EltonTraits 1.0: Species-level foraging attributes of the world's birds and mammals.  
417 *Ecology*, **95**, 2027.
- 418 Woodward, F.I. (1975) The Climatic Control of the Altitudinal Distribution of *Sedum rosea*  
419 (L.) Scop. and *S. telephium* L. *New Phytologist*, **74**, 335–348.
- 420
